# Supplementary material
Source: MDPI journal article supplement (https://www.mdpi.com/2227-9717/9/11/1872)
Supplement: s1 [file s1]

**Table S1.** NEs formulation optimization. Different NEs were produced containing SO (1 and 5%) as the oily phase and Pluronic® F-127 (10%, 12.5%, and 15%) as the aqueous phase.

| Aqueous Phase (%) | Oil Phase (%) | Average size (nm) | PdI          | Appearance                                              | Activity against <i>Rhizopus oryzae</i> |
|-------------------|---------------|-------------------|--------------|---------------------------------------------------------|-----------------------------------------|
| 10                | 1             | -                 | -            | Limpid                                                  | Ø                                       |
| 10                | 5             | -                 | -            | Turbid (=milky), after room temperature it formed phase | Ø                                       |
| 12.5              | 1             | -                 | -            | Limpid                                                  | Ø                                       |
| 15                | 1             | -                 | -            | Limpid                                                  | Ø                                       |
| 15*               | 5             | 45.56 ± 15.76     | 0.249± 0.014 | Liquid, transparent, and no phase separation            | 97.66 µg/ml                             |

\* Optimal NE based on its appearance and antifungal activity.
